# Supplementary material for: Standardized Description of Degraded Land Reclamation Actions and Mapping of Actors’ Roles: A Key Step for Action in Combatting Desertification (Niger)
Source: MDPI journal article supplement (doi:10.3390/land12051064), 2023-05-13
Supplement: s1 [file s1]

Table S1: The Donors (Do)

| Categories of Donors *                                 | Stakeholders                                                                                                                                                                                                                                                                                                                                                                                                                                  |
|--------------------------------------------------------|-----------------------------------------------------------------------------------------------------------------------------------------------------------------------------------------------------------------------------------------------------------------------------------------------------------------------------------------------------------------------------------------------------------------------------------------------|
| African Development Agencies ( <i>ADA-Do</i> )*        | New Partnership for Africa's Development (NEPAD), Intergovernmental Authority on Development (IGAD)                                                                                                                                                                                                                                                                                                                                           |
| International Development Agencies ( <i>IDA-Do</i> )*  | French Development Agency (AFD), Belgian Development Agency (Enable), United States Agency for International Development (USAID), National Agency for the Funding of Local Government (ANFICT)                                                                                                                                                                                                                                                |
| United Nations' Agencies as a Donor ( <i>UNA-Do</i> )* | United Nation Capital Development Fund (UNCDF), International Fund for Agricultural Development (IFAD), Global Environment Facility (GEF), Food and Agriculture Organization of the United Nations (FAO), International Organization for Migration (IOM), World Food Programme (WFP), United Nations Development Programme (UNDP), United Nations Environment Programme (UNEP), Organization of the Petroleum Exporting Countries Fund (OPEC) |
| African Bank ( <i>AB-Do</i> )*                         | African Development Bank Group (AfDB), West African Development Bank (BOAD)                                                                                                                                                                                                                                                                                                                                                                   |
| Community Banks ( <i>CB-Do</i> )*                      | Islamic Development Bank (IsDB)                                                                                                                                                                                                                                                                                                                                                                                                               |
| The Niger public Budget ( <i>NpB-Do</i> )*             | National Budget                                                                                                                                                                                                                                                                                                                                                                                                                               |
| Bretton Woods Institutions ( <i>BWI-Do</i> )*          | World Bank, International Monetary Fund (IMF), Inter-American Development Bank (IDB)                                                                                                                                                                                                                                                                                                                                                          |
| International organizations ( <i>IO-Do</i> )*          | Organization of Islamic Cooperation (OIC), Heavily Indebted Poor Countries (HIPC), International Union for Conservation of Nature (IUCN), International Organization of the Francophonie (OIF), Millennium Challenge Account Niger (MCA), Eau Vive International, French Red Cross                                                                                                                                                            |
| Technical and Financial Partners ( <i>TFP-Do</i> )*    | Denmark, Netherlands, Germany, Regional Council of Grand Est (Lorraine), Spain, Italy, Luxembourg, Australia, Switzerland                                                                                                                                                                                                                                                                                                                     |
| European Union ( <i>EU-Do</i> )*                       | European Investment Bank (EIB), European Union                                                                                                                                                                                                                                                                                                                                                                                                |

\* Legend for Figure 9 :

**Donors:** **ADA/Do**; African Development Agencies - **IDA/Do**; International Development Agencies - **UNA/Do**; United Nations' Agencies as a Donor - **AB/Do**; African Bank - **CB/Do**; Community Banks - **NpB/Do**; The Niger public Budget - **BWI/Do**; Bretton Woods Institutions - **IO/Do**; International organizations - **TFP/Do** ;Technical and Financial Partners - **EU/Do**; European Union (See detail in Table S1)

Table S2 : The Fund mobilizers (Fm)

| Categories of Fund mobilizers                               | Stakeholders                                                                                                                                                                                                                                                                                                                                                                                                                                                                                                                                                                                                                                                          |
|-------------------------------------------------------------|-----------------------------------------------------------------------------------------------------------------------------------------------------------------------------------------------------------------------------------------------------------------------------------------------------------------------------------------------------------------------------------------------------------------------------------------------------------------------------------------------------------------------------------------------------------------------------------------------------------------------------------------------------------------------|
| The Niger ( <i>Niger/Fm</i> )*                              | The Niger public authority                                                                                                                                                                                                                                                                                                                                                                                                                                                                                                                                                                                                                                            |
| NGOs and International associations<br>( <i>I.NGO/Fm</i> )* | Agency for International Development Cooperation (CECI-Niger), International Committee of the Red Cross (ICRC), Cooperation for the Development of Emerging Countries (COSPE), Samaritan's Purse, Save the Children, Lutheran World Relief (LWR), AFRICA SOUL, CARE International, Catholic Relief Services (CRS), Concern Worldwide, Water for Life, Safety Nets, Strategic Defense Initiative (SDI), Pan African Development Initiatives (IPAD), Islamic Relief, Agro Sans Frontieres (ASF), Delta 21, EUPHORBE, GOAL Emergency to the needy, OXFAM, World Vision, Drylands Development Programme (DryDev), Action Against Hunger (ACF), World Food Programme (WFP) |
| NGOs and Nigerien associations<br>( <i>N.NGO/Fm</i> )*      | Youth Action for Development (AJEDEV), Action for the Promotion of Local Initiatives (APIL), AREWA RESILIENCE, Association for the Safeguarding of Giraffes in Niger (ASGN), Caritas Development (CADEV), Nigerien Red Cross, GRPT Matassa, ADKOUL (ASB), ADLA, AJEDD, AJEVEN, ENELCOP, FADES, HED TAMAT, NAZARI, TALLAHI, YANAYI, MAZADA, Community Initiatives Support Network (RAIC), Support Network for Local Initiatives (RAIL-Niger), Association for the revitalization of livestock in Niger (AREN)                                                                                                                                                          |
| Sub-regional organizations ( <i>RO/Fm</i> )*                | CILSS (Permanent Interstate Committee for Drought Control in the Sahel)                                                                                                                                                                                                                                                                                                                                                                                                                                                                                                                                                                                               |

\* Legend Figure 9 :

**Fund Mobilizers:** **Niger/Fm**; The Niger public authority - **I.NGO/Fm**; NGOs and International associations - **N.NGO/Fm**; NGOs and Nigerien associations - **RO/Fm**; Sub-regional Organizations (*See detail in Table S2*)

Table S3 : The Operators (Op)

| Categories of Operators*                                 | Stakeholders                                                                                                                                                                                                                                                                                                                                                                                                                                                                                                                                                                                                                                                          |
|----------------------------------------------------------|-----------------------------------------------------------------------------------------------------------------------------------------------------------------------------------------------------------------------------------------------------------------------------------------------------------------------------------------------------------------------------------------------------------------------------------------------------------------------------------------------------------------------------------------------------------------------------------------------------------------------------------------------------------------------|
| United Nations' Agencies ( <i>UNA/Op</i> )*              | World Food Programme (WFP)                                                                                                                                                                                                                                                                                                                                                                                                                                                                                                                                                                                                                                            |
| The Niger as a Fundraiser ( <i>Niger/Op</i> )*           | Decentralized institutions and services of Niger, Support Project for the Special Program for Food Security (PAPSSA), Family Farming Development Programme (ProDAF), NGOs and international associations, NGOs and nigerien associations                                                                                                                                                                                                                                                                                                                                                                                                                              |
| Local Authorities ( <i>LA/Op</i> )*                      | National Agency for the Funding of Local Government (ANFICT),                                                                                                                                                                                                                                                                                                                                                                                                                                                                                                                                                                                                         |
| NGOs and International associations ( <i>I-NGO/Op</i> )* | Agency for International Development Cooperation (CECI-Niger), International Committee of the Red Cross (ICRC), Cooperation for the Development of Emerging Countries (COSPE), Samaritan's Purse, Save the Children, Lutheran World Relief (LWR), AFRICA SOUL, CARE International, Catholic Relief Services (CRS), Concern Worldwide, Water for Life, Safety Nets, Strategic Defense Initiative (SDI), Pan African Development Initiatives (IPAD), Islamic Relief, Agro Sans Frontieres (ASF), Delta 21, EUPHORBE, GOAL Emergency to the needy, OXFAM, World Vision, Drylands Development Programme (DryDev), Action Against Hunger (ACF), World Food Programme (WFP) |
| NGOs and Nigerien associations ( <i>N-NGO/Op</i> )*      | Youth Action for Development (AJEDEV), Action for the Promotion of Local Initiatives (APIL), AREWA RESILIENCE, Association for the Safeguarding of Giraffes in Niger (ASGN), Caritas Development (CADEV), Nigerien Red Cross, GRPT Matassa, ADKOUL (ASB), ADLA, AJEDD, AJEVEN, ENELCOP, FADES, HED TAMAT, NAZARI, TALLAHI, YANAYI, MAZADA, Community Initiatives Support Network (RAIC), Support Network for Local Initiatives (RAIL-Niger), Association for the revitalization of livestock in Niger (AREN)                                                                                                                                                          |
| Sub-regional Organizations ( <i>RO/Op</i> )*             | CILSS (Permanent Interstate Committee for Drought Control in the Sahel)                                                                                                                                                                                                                                                                                                                                                                                                                                                                                                                                                                                               |

\*Legend for Figure 9:

**Operators:** **UNA/Op**; United Nations' Agencies - **Niger/Op**; The Niger as a Fundraiser - **LA/Op**; Local authorities - **I.NGO/Op**; NGOs and international associations - **N.NGO/Op**; NGOs and Nigerien associations- **RO/Op**; Sub-regional organizations (see detail in Table S4 )

Table S4 : Forms of implementation of DLRA funding in Niger

| Categories of forms                  | Names                                                                                                                                                                                                                                                                                                                                                                                                                                                                                                                                                                                                                                                                                                                                                                                                                                                                                                                                                                                                                                                                                                                                                                                                                                                                                                                                                                                                                                                                                                                                                                                                                                                                                                                                                                                                                                                                                                                                                                                                                                                                              |
|--------------------------------------|------------------------------------------------------------------------------------------------------------------------------------------------------------------------------------------------------------------------------------------------------------------------------------------------------------------------------------------------------------------------------------------------------------------------------------------------------------------------------------------------------------------------------------------------------------------------------------------------------------------------------------------------------------------------------------------------------------------------------------------------------------------------------------------------------------------------------------------------------------------------------------------------------------------------------------------------------------------------------------------------------------------------------------------------------------------------------------------------------------------------------------------------------------------------------------------------------------------------------------------------------------------------------------------------------------------------------------------------------------------------------------------------------------------------------------------------------------------------------------------------------------------------------------------------------------------------------------------------------------------------------------------------------------------------------------------------------------------------------------------------------------------------------------------------------------------------------------------------------------------------------------------------------------------------------------------------------------------------------------------------------------------------------------------------------------------------------------|
| International development programmes | World Food Programme (WFP), Lake Chad Basin Sustainable Development Programme (PRODEBALT), Regional Program for Sustainable Land Management and Climate Change Adaptation in the Sahel and West Africa (PRGDT), Food and Nutritional Security Programme entitled « SAWKI », Drylands Development Programme (DryDev)                                                                                                                                                                                                                                                                                                                                                                                                                                                                                                                                                                                                                                                                                                                                                                                                                                                                                                                                                                                                                                                                                                                                                                                                                                                                                                                                                                                                                                                                                                                                                                                                                                                                                                                                                                |
| National development programmes      | Livestock support programme (PRADEL), Family Farming Development Programme (ProDAF), Food Crisis Response and Emergency Support Programme, Niger Community Cohesion Programme (PCCN), Program to combat silting in the Niger River Basin (PLCE – BN), Gum tree programme, Special Food Security Programme Phase II (PSSA II), Food Crisis Response and Emergency Support Program, Development and Climate Change Adaptation Program in the Niger Basin (PIDACC/BN), Agricultural Sector Development Programme (PDSA), Rural Sector Development Support Programme (PADSR), Community Action Programme phases I,II, III, and IV (PAC 1,2,3,4), Local Economic Development Support Programme (PADEL)                                                                                                                                                                                                                                                                                                                                                                                                                                                                                                                                                                                                                                                                                                                                                                                                                                                                                                                                                                                                                                                                                                                                                                                                                                                                                                                                                                                  |
| Sub-regional development projects    | Regional Sahel Pastoralism Support Project (PRAPS), Resilience and Economic Growth in the Sahel –Enhanced Resilience (REGIS-ER), Lake Chad Basin Socio-Economic Recovery Project (RESILAC)                                                                                                                                                                                                                                                                                                                                                                                                                                                                                                                                                                                                                                                                                                                                                                                                                                                                                                                                                                                                                                                                                                                                                                                                                                                                                                                                                                                                                                                                                                                                                                                                                                                                                                                                                                                                                                                                                         |
| National development projects        | Protection and Equitable Management of Agropastoral Resources in the Tillaberi Region (PGERAT), Project in a high environmental and social risk area (Zares), Procosep, Rural Poles Project (RPP), Fauna Corridors, Youth Diffa Project (BANA), Sustainable Land Management Project (PGDT), River Project, Agricultural Products Intensification Project for Food Security in the Tahoua and Tillaberi Regions (PIPAS/SA), Water reclamation project in the regions of Dosso and Tillaberi (PVDT), Community Resilience to Climate Change Project in Kalfou (PReCom), Water Resources Mobilization and Development Project (PROMOVARE), The Water Mobilization Project to enhance Food Security in Maradi, Tahoua and Zinder Regions (PMERSA-MTZ), Project for Oasis Micro-Basin Sand Invasion Control (PLECO), Niger - Nigeria Integrated Ecosystem Management Project (IEMP), Disaster Risk Management and Urban Development Project (DRMP-UD), Djagblé Plain Rural Development Project (PDRD), Water Resources Development and Sustainable Ecosystem Management Project in the Niger River Basin (PDREGDE), Project for the Development of Exports and Agro-Sylvo-pastoral Markets (PRODEX), Air and Tenere Resources Co-Management Project (COGERAT), Food Security and Development Support Project in the Maradi Region (PASADEM), Climate-Sensitive Agriculture Support Project (PASEC), Household Food Security Support Project (PASAM 4), Support Project for Securing Pastoral Mobility (Zamtapo), Support project for pastoral production in the Tahoua region (PAPAT), Project for the improvement and diversification of farming systems (PADSE), Emergency Project to Support Food Security and Rural Development (PUSADER), Refugee and Host Community Support Project (PARCA), Livestock Sector Support Project (PASEL), Local Development Support Project of the Kandadji Program (PADL-K), Biocarbone Project, Arziki Project, APLSS Project, Action Against Desertification Project (ACD), Resilience Building Project to Combat Food Insecurity in Niger (P2RS) |

Table S5 : The Implementers (Im)

| Categories of Implementers *                                               | Stakeholders                                                                                                                                                                                                                                                                                                                                                                                                                                                                                                                                                                                                                                                                                                         |
|----------------------------------------------------------------------------|----------------------------------------------------------------------------------------------------------------------------------------------------------------------------------------------------------------------------------------------------------------------------------------------------------------------------------------------------------------------------------------------------------------------------------------------------------------------------------------------------------------------------------------------------------------------------------------------------------------------------------------------------------------------------------------------------------------------|
| International development cooperation agencies ( <i>IDCA/Im</i> )*         | GIZ, SWISSAID, COOPI, International Committee of the Red Cross (ICRC), Cooperation for the development of emerging countries (COSPE)                                                                                                                                                                                                                                                                                                                                                                                                                                                                                                                                                                                 |
| Local Authorities as an Implementer ( <i>LA-Im</i> )*                      | Regional Council, Municipality                                                                                                                                                                                                                                                                                                                                                                                                                                                                                                                                                                                                                                                                                       |
| The Niger as an implementer ( <i>Niger/Im</i> ) *                          | Food Crisis Unit (CCA), National Agency For Great Green Wall (NAGGW), Ministry of Agriculture and Livestock, National Center for Ecological Monitoring (CNSE), General Direction of Water and Forests (DGEF), National System for the Prevention and Management of Food Disasters and Crises (DNPGCCA)                                                                                                                                                                                                                                                                                                                                                                                                               |
| NGOs and international associations as an Implementer ( <i>I.NGO/Im</i> )* | World Vision , Care International , Sahel Eco , Save the Children , Samaritan's Purse , OXFAM , Emergency to the needy, Thiebon , IQRA , GOAL , EUPHORBE , ENVI , Delta 21 , African Wildlife Foundation (AWF), Agro Sans Frontieres (ASF), Mercycorps , Lutheran World Relief (LWR), Islamic Relief, Pan African Development Initiatives ( IPAD), Water for life , Concern Worldwide , Catholic Relief Services (CRS) , Green Africa, AFRICA SOUL , Action Against Hunger (ACF)                                                                                                                                                                                                                                     |
| NGOs and Nigerien associations ( <i>N.NGO/Im</i> )*                        | GADED , Croix-Rouge Nigérienne , GRPT Matassa , HED-TAMAT , AEGO , CADEL , DURAZINDER , FOUSSA'A , GOULBI , , ONG KARKARA , Rayu-K , REFORM , ADN, PARSE , SADEV , TALLAH , TIKIBILANA, Youth Action for Development (AJEDEV), Action for the Promotion of Local Initiatives (APIL), AREWA RESILIENCE , Association for the Safeguarding of Giraffes in Niger (ASGN) , Caritas Development (CADEV) , Nigerien Red Cross , GRPT Matassa , ADKOUL (ASB) , ADLA , AJEDD , AJEVEN , ENELCOP , FADES , HED TAMAT , NAZARI, TALLAHI , YANAYI , MAZADA , Community Initiatives Support Network (RAIC) , Support Network for Local Initiatives (RAIL-Niger), Association for the revitalization of livestock in Niger (AREN) |
| International development programmes ( <i>I.DP/Im</i> )*                   | Lake Chad Basin Sustainable Development Programme (PRODEBALT), Regional Program for Sustainable Land Management and Climate Change Adaptation in the Sahel and West Africa (PRGDT)                                                                                                                                                                                                                                                                                                                                                                                                                                                                                                                                   |
| National development programmes ( <i>N.DP/Im</i> )*                        | Family Farming Development Programme (ProDAF) , Food Crisis Response and Emergency Support Programme, Niger Community Cohesion Programme (PCCN) , Program to combat silting in the Niger River Basin (PLCE – BN) , Gum tree programme, Special Food Security Programme Phase II (PSSA II) , Food Crisis Response and Emergency Support Program, Development and Climate Change Adaptation Program in the Niger Basin (PIDACC/BN) , Agricultural Sector Development Programme (PDSA), Rural Sector Development Support Programme (PADSR) , Community Action Programme phases I,II , III, and IV (PAC 1,2,3,4) , Local Economic Development Support Programme (PADEL)                                                  |

|                                                 |                                                                                                                                                                                                                                                                                                                                                                                                                                                                                                                                                                                                                                                                                                                                                                                                                                                                                                                                                                                                                                                                                                                                                                                                                                                                                                                                                                                                                                                                                                                                                                                                                                                                                                                                                                                                                                                                                                                                                                                                                                                                                                                                                                                                                           |
|-------------------------------------------------|---------------------------------------------------------------------------------------------------------------------------------------------------------------------------------------------------------------------------------------------------------------------------------------------------------------------------------------------------------------------------------------------------------------------------------------------------------------------------------------------------------------------------------------------------------------------------------------------------------------------------------------------------------------------------------------------------------------------------------------------------------------------------------------------------------------------------------------------------------------------------------------------------------------------------------------------------------------------------------------------------------------------------------------------------------------------------------------------------------------------------------------------------------------------------------------------------------------------------------------------------------------------------------------------------------------------------------------------------------------------------------------------------------------------------------------------------------------------------------------------------------------------------------------------------------------------------------------------------------------------------------------------------------------------------------------------------------------------------------------------------------------------------------------------------------------------------------------------------------------------------------------------------------------------------------------------------------------------------------------------------------------------------------------------------------------------------------------------------------------------------------------------------------------------------------------------------------------------------|
| National development projects<br>(NDp/Im)*      | ACE Partner , Building Resilience and Adaptation to Climate Extremes and Disasters (BRACED) , PPI RUWANMU , PPILDA , Protection and Equitable Management of Agropastoral Resources in the Tillaberi Region (PGERAT) , Project in a high environmental and social risk area (Zares) , Procosep , Rural Poles Project (RPP) , Fauna Corridors , Youth Diffa Project (BANA) , Sustainable Land Management Project (PGDT) , River Project, Agricultural Products Intensification Project for Food Security in the Tahoua and Tillaberi Regions (PIPAS/SA) , Water reclamation project in the regions of Dosso and Tillaberi (PVDT) , Community Resilience to Climate Change Project in Kalfou (PReCom) , Water Resources Mobilization and Development Project (PROMOVARE) , The Water Mobilization Project to enhance Food Security in Maradi, Tahoua and Zinder Regions (PMERSA-MTZ), Project for Oasis Micro-Basin Sand Invasion Control (PLECO), Niger - Nigeria Integrated Ecosystem Management Project (IEMP), Disaster Risk Management and Urban Development Project (DRMP-UD), Djagblé Plain Rural Development Project (PDRD) , Water Resources Development and Sustainable Ecosystem Management Project in the Niger River Basin (PDREGDE) , Project for the Development of Exports and Agro-Sylvo-pastoral Markets (PRODEX) , Air and Tenere Resources Co-Management Project (COGERAT) , Food Security and Development Support Project in the Maradi Region (PASADEM), Climate-Sensitive Agriculture Support Project (PASEC), Household Food Security Support Project (PASAM 4), Support Project for Securing Pastoral Mobility (Zamtapo), Support project for pastoral production in the Tahoua region (PAPAT), Project for the improvement and diversification of farming systems (PADSE), Emergency Project to Support Food Security and Rural Development (PUSADER) , Refugee and Host Community Support Project (PARCA) , Livestock Sector Support Project (PASEL) , Local Development Support Project of the Kandadji Program (PADL-K),Biocarbone Project, Arziki Project, APLSS Project, Action Against Desertification Project (ACD) , Resilience Building Project to Combat Food Insecurity in Niger (P2RS) |
| Sub-regional development projects<br>(RODp/Im)* | Regional Sahel Pastoralism Support Project (PRAPS), Resilience and Economic Growth in the Sahel –Enhanced Resilience (REGIS-ER), Lake Chad Basin Socio-Economic Recovery Project (RESILAC)                                                                                                                                                                                                                                                                                                                                                                                                                                                                                                                                                                                                                                                                                                                                                                                                                                                                                                                                                                                                                                                                                                                                                                                                                                                                                                                                                                                                                                                                                                                                                                                                                                                                                                                                                                                                                                                                                                                                                                                                                                |

\* Legend for Figure 9

**Table S6: Contribution to the treatment of the 279074 ha by the different actors accordingly to their respective role.**

*Table S6.a: as Donor*

| Legend        | See detail in Table S1              | % total Donor's contribution |
|---------------|-------------------------------------|------------------------------|
| <i>ADA/Do</i> | African Development Agencies        | <1%                          |
| <i>IDA/Do</i> | International Development Agencies  | 7%                           |
| <i>UNA/Do</i> | United Nations' Agencies as a Donor | 36%                          |
| <i>AB/Do</i>  | African Bank                        | 3%                           |
| <i>CB/Do</i>  | Community Banks                     | <1%                          |
| <i>NpB/Do</i> | The Niger public Budget             | 12%                          |
| <i>BWI/Do</i> | Bretton Woods Institutions          | 35%                          |
| <i>IO/Do</i>  | International organizations         | <1%                          |
| <i>TFP/Do</i> | Technical and Financial Partners    | 3%                           |
| <i>EU/Do</i>  | European Union                      | 4%                           |

*Table S6.c: as Operator*

| Legend          | See detail in Table S4              | % total Operator's contribution |
|-----------------|-------------------------------------|---------------------------------|
| <i>UNA/Op</i>   | United Nations' Agencies            | 18%                             |
| <i>Niger/Op</i> | The Niger as a Fundraiser           | 64%                             |
| <i>LA/Op</i>    | Local authorities                   | <1%                             |
| <i>I.NGO/Op</i> | NGOs and International associations | 14%                             |
| <i>N.NGO/Op</i> | NGOs and Nigerien associations      | 3%                              |
| <i>RO/Op</i>    | Sub-regional organizations          | 1%                              |

*Table S6.b: as Fund Mobilizer*

| Legend          | See detail in Table S2              | % Fund Mobilizer's contribution |
|-----------------|-------------------------------------|---------------------------------|
| <i>Niger/Fm</i> | The Niger public authority          | 64%                             |
| <i>I.NGO/Fm</i> | NGOs and International associations | 32%                             |
| <i>N.NGO/Fm</i> | NGOs and Nigerien associations      | 3%                              |
| <i>RO/Fm</i>    | Sub-regional Organizations          | 1%                              |

*Table S6.c: as Implementer*

| Legend          | See detail in Table S5                                | % total Implementer's contribution |
|-----------------|-------------------------------------------------------|------------------------------------|
| <i>IDCA/Im</i>  | International development cooperation agencies        | <1%                                |
| <i>LA/Im</i>    | Local authorities as an Implementer                   | <1%                                |
| <i>Niger/Im</i> | The Niger as an implementer                           | 13%                                |
| <i>I.NGO/Im</i> | NGOs and International associations as an Implementer | 16%                                |
| <i>N-NGO/Im</i> | NGOs and Nigerien associations                        | 11%                                |
| <i>I.DP/Im</i>  | International development programmes                  | 18%                                |
| <i>N.DP/Im</i>  | National development programmes                       | 10%                                |
| <i>Np/Im</i>    | National development projects                         | 31%                                |
| <i>RO/Im</i>    | Sub-regional development projects                     | 1%                                 |
